# Supplementary material for: Simple Optimal Sampling Algorithm to Strengthen Digital Soil Mapping Using the Spatial Distribution of Machine Learning Predictive Uncertainty: A Case Study for Field Capacity Prediction
Source: MDPI journal article supplement (doi:10.3390/land11112098), 2022-11-21
Supplement: s1 [file s1]

Archive with 1 entries (1 files):
- land-1992675-supplementary.pdf
